# Supplementary material
Source: publisher site journal article supplement (http://www.kjim.org/upload/media/kjim-2019-160-suppl2.pdf)
Supplement: Supplementary file 1 [file kjim-2019-160-suppl2.pdf]

**Supplementary Table 2. The result of standardized beta coefficient for each variable related to free thyroxine**

| Variable          | $\beta$ Coefficient | p value |
|-------------------|---------------------|---------|
| Fasting glucose   | 0.329               | 0.921   |
| Fasting insulin   | -1.627              | 0.076   |
| HOMA-IR           | -0.400              | 0.098   |
| HbA <sub>1c</sub> | -0.261              | 0.025   |
| Age               | -21.269             | < 0.001 |
| Urine iodine      | -407.778            | 0.349   |

HOMA-IR, homeostasis model assessment of insulin resistance; HbA<sub>1c</sub>, hemoglobin A<sub>1c</sub>.
